# Supplementary material
Source: publisher site journal article supplement (https://www.spandidos-publications.com/5171/downloadSupplementary)

Figure S1. Transfection efficiency for the SPRY4-IT1 OE vector and SPRY4-IT1 targeting shRNAs relative to empty vector and shNC, respectively, in DU145 and PC3 cell lines. SPRY4-IT1 was overexpressed in (A) DU145 and (B) PC3 cell lines. Expression of SPRY4-IT1 was knocked down by both sh-RNAs in (C) DU145 and (D) PC3 cell lines, and sh1 had greater efficiency. \* $P < 0.05$ , \*\*\* $P < 0.001$ . SPRY4-IT1, sprouty4-intron 1; OE, overexpression; OE-NC, OE negative control (empty vector); shRNA, short hairpin RNA; shNC, short hairpin negative control; sh1, sh-SPRY4-IT1-1; sh2, sh-SPRY4-IT1-2.

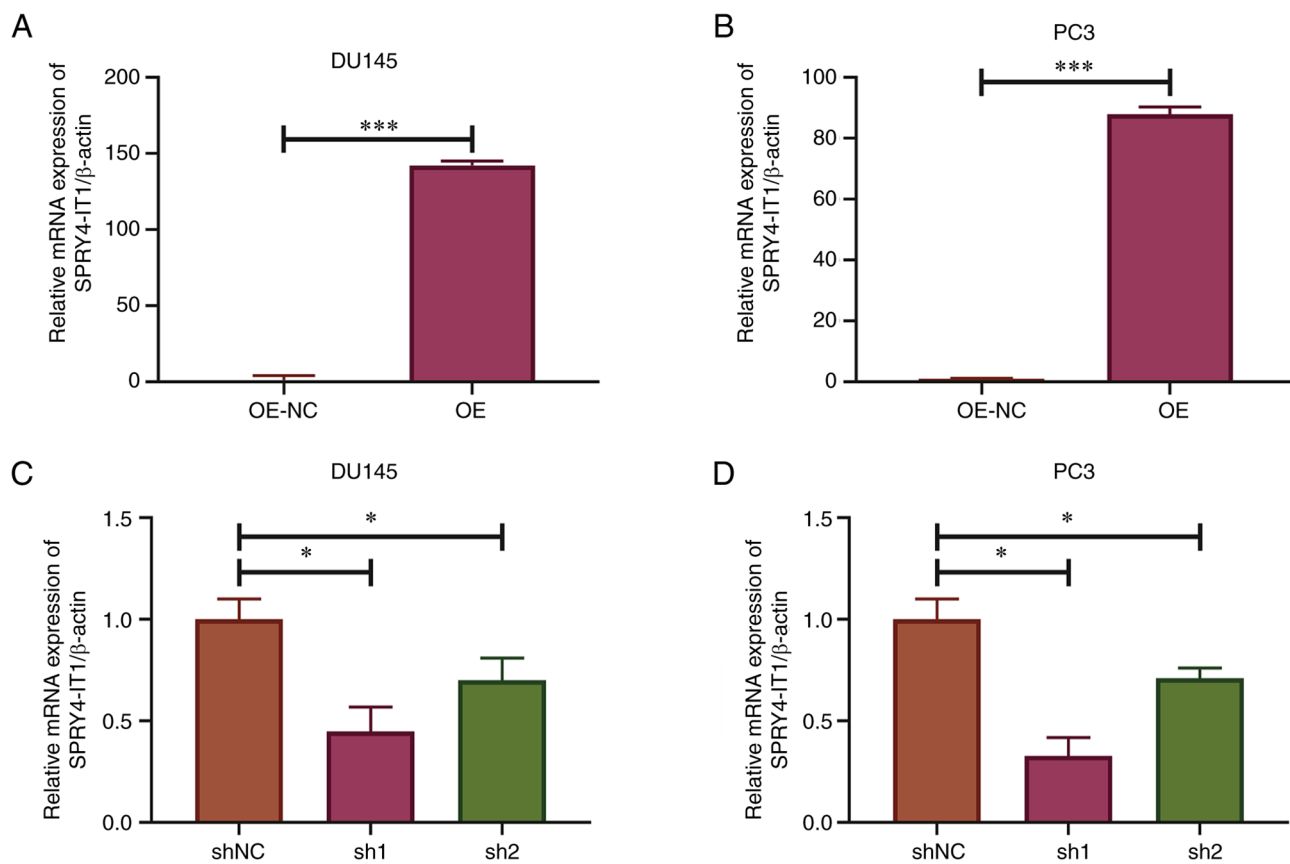

Supplement: Supplementary file 1 [file downloadSupplementary]
